# Supplementary material
Source: publisher figshare collection journal article supplement (https://sage.figshare.com/ndownloader/files/22784228)

**Chart 1 : Admission diagnosis [n=36]**

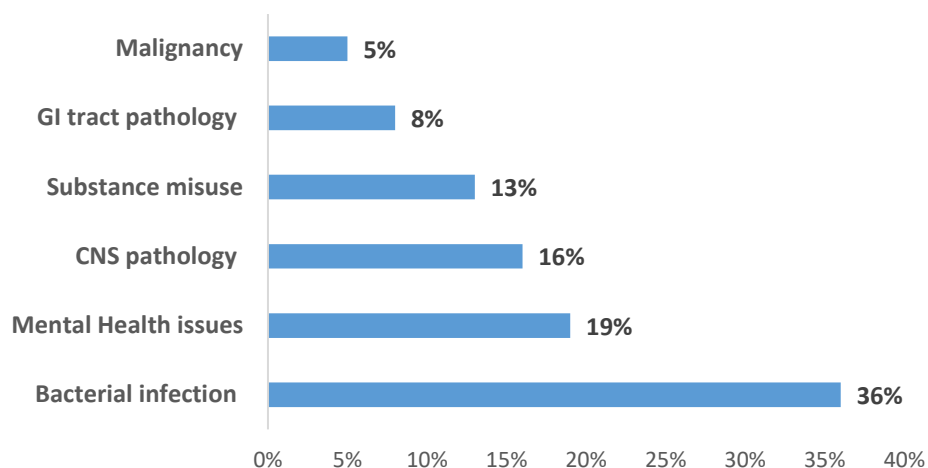

**Chart 2 : Current and past comorbidities [ n= 36]**

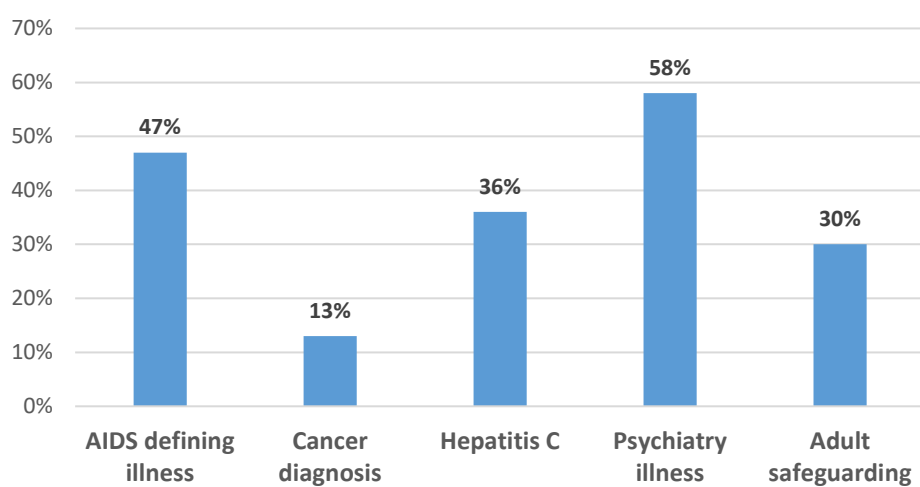

Supplement: Supplementary file 1 [file 22784228]
